# Supplementary material for: Ni@Au nanoparticles for surface enhanced Raman spectroscopy based ultrasensitive magnetic immunoassay on aflatoxin B1
Source: Royal Society of Chemistry journal article supplement (doi:10.1039/c6ra09397c), 2016-01-01
Supplement: c6ra09397c1.pdf [file c6ra09397c1.pdf]

## Supporting information

### Ni@Au Nanoparticles for Surface Enhanced Raman Spectroscopy Based Ultrasensitive Magnetic Immunoassay on Aflatoxin B1

Congwei Fang, Chao Wei, Minmin Xu\*, Yaxian Yuan, Renao Gu, Jianlin Yao\*

#### 1. Elemental analysis of EDAX

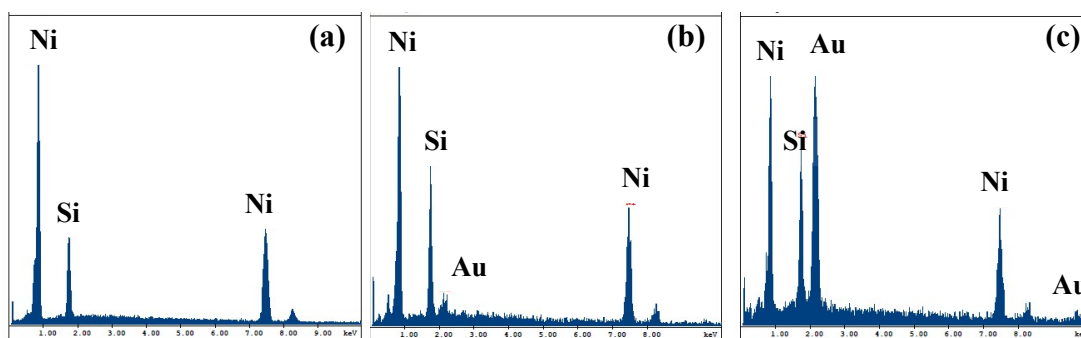

**Figure S1** EDAX images of Ni nanoparticles (a), Ni-Au seeds (b), and Ni@Au nanoparticles(c), respectively.

2. (a) Optimization of experimental conditions for SERS-immunoassay with immune  $\text{Fe}_3\text{O}_4@Au$   
It indicated that the optimal ratio was 1:1 (spectrum 1).

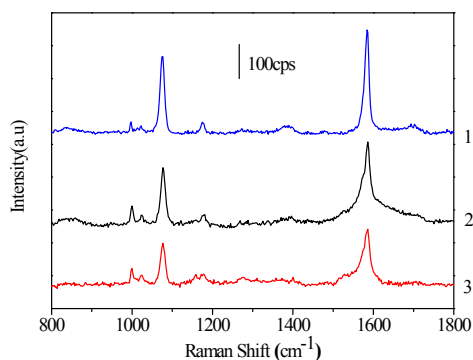

**Figure S2** The SERS spectra of samples with different volume ratios (immune-magnetic beads vs. labeled immunoassays gold) (1) 1.0:1.0; (2)1.0:0.5; (3)1.0:1.5

- (b) Competitive immunoassay of AFB<sub>1</sub> based on SERS by using immune  $\text{Fe}_3\text{O}_4@Au$

From the fitted curve (Figure S4), one estimated that the  $\text{IC}_{50}$  was  $0.10 \text{ pg} \cdot \text{mL}^{-1}$ .

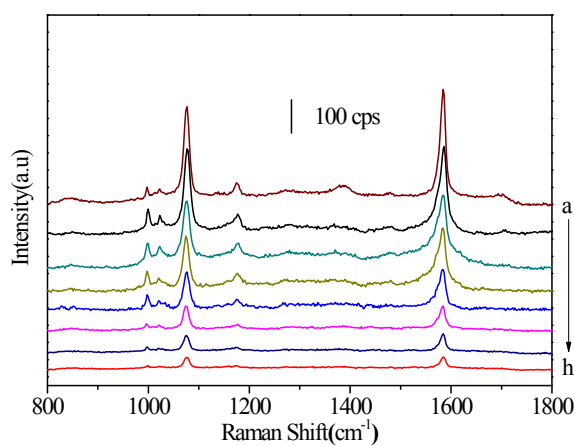

**Figure S3** SERS spectra of immunoassay for AFB<sub>1</sub> with different concentrations: (a-h: 0; 1 fg·mL<sup>-1</sup>; 10 fg·mL<sup>-1</sup>; 100 fg·mL<sup>-1</sup>; 1 pg·mL<sup>-1</sup>; 10 pg·mL<sup>-1</sup>; 100 pg·mL<sup>-1</sup>; 1 ng·mL<sup>-1</sup>.)

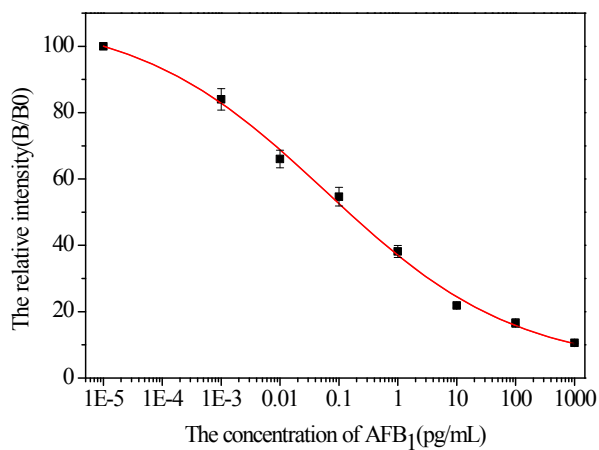

**Figure S4** Calibration curve with the plot of band intensities at 1584 cm<sup>-1</sup> as the function of the logarithm of AFB<sub>1</sub> concentrations. Notes: This is the result of the three experiments.

### 3. LC-MS measurements on the AFB<sub>1</sub> and the calibration curve

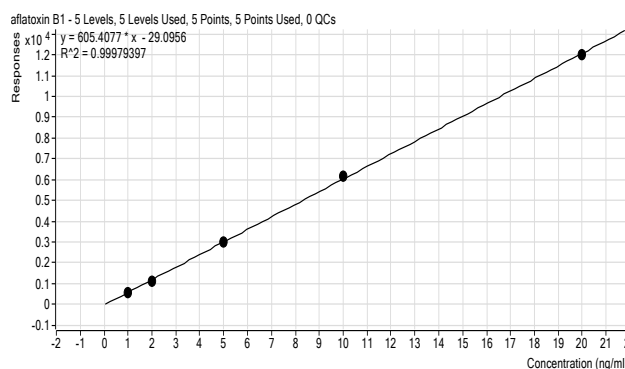

**Figure S5** The calibration curve of LC-MS detection for AFB<sub>1</sub> (1-20 ng·mL<sup>-1</sup>)

#### 4. The process of detection on AFB<sub>1</sub> in maize:

The maize meal was homogenized and diluted to prepare maize juice. Typically, different concentrations of AFB<sub>1</sub> solutions were added to 4 mL of maize juice for preparing AFB<sub>1</sub> contained maize solutions. Then, these maize juice were centrifuged at 5000 r·min<sup>-1</sup> for 20 min. Then the solid material was removed by centrifugation, and the supernatant was diluted for testing. 0.1 mL of the supernatant was extracted and diluted to 0.5 mL to ensure the final concentration was 1 fg·mL<sup>-1</sup>, 10 fg·mL<sup>-1</sup>, 100 fg·mL<sup>-1</sup>, 10 pg·mL<sup>-1</sup>, respectively. The final samples were tested by competitive magnetic immunoassay based on SERS. As for establish standard curves, we can obtain the concentrations of AFB<sub>1</sub> through multistage dilution of the samples.
